# Supplementary material for: CRISPR/Cas9-targeted mutagenesis of Os8N3 in rice to confer resistance to Xanthomonas oryzae pv. oryzae
Source: PubMed Central journal article supplement (PMC6708514; doi:10.1186/s12284-019-0325-7), 2019-08-24
Supplement: 12284_2019_325_MOESM2_ESM.pdf [file 12284_2019_325_MOESM2_ESM.pdf]

Kitaake

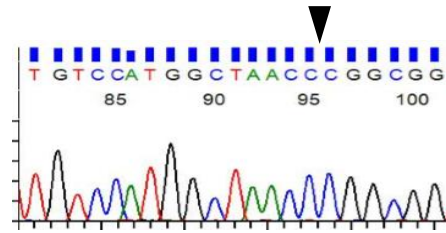

WT: TGTCCATGGCTAACC-CGGCGG  
WT: TGTCCATGGCTAACC-CGGCGG

Wild-type

OsU6a *xa13m*/Kit T<sub>0</sub>

1A

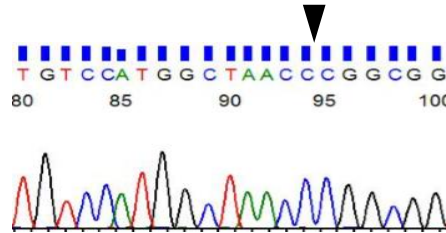

WT: TGTCCATGGCTAACC-CGGCGG  
WT: TGTCCATGGCTAACC-CGGCGG

Wild-type

2A

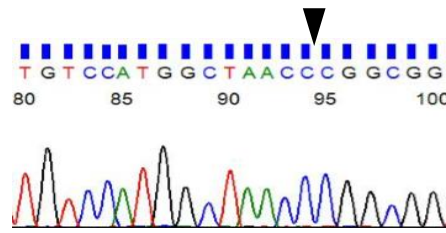

WT: TGTCCATGGCTAACC-CGGCGG  
WT: TGTCCATGGCTAACC-CGGCGG

Wild-type

3A

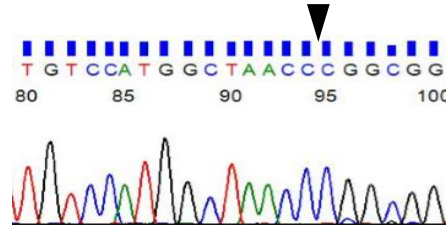

WT: TGTCCATGGCTAACC-CGGCGG  
WT: TGTCCATGGCTAACC-CGGCGG

Wild-type

4A

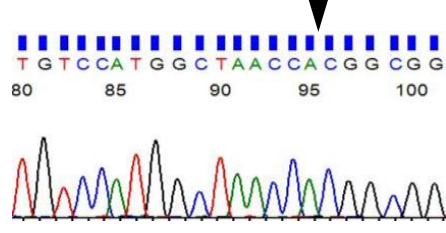

M1: TGTCCATGGCTAACCACGGCGG  
M1: TGTCCATGGCTAACCACGGCGG

Homozygote
