# Supplementary material for: CRISPR/Cas9-targeted mutagenesis of Os8N3 in rice to confer resistance to Xanthomonas oryzae pv. oryzae
Source: PubMed Central journal article supplement (PMC6708514; doi:10.1186/s12284-019-0325-7), 2019-08-24
Supplement: 12284_2019_325_MOESM3_ESM.pdf [file 12284_2019_325_MOESM3_ESM.pdf]

|                                        |              |                                                          |              |
|----------------------------------------|--------------|----------------------------------------------------------|--------------|
| Kitaake                                |              | WT: TGTCCATGGCTAACCCGGCGG<br>WT: TGTCCATGGCTAACCCGGCGG   | Wild-type    |
| OsU6a <i>xa13m</i> /Kit T <sub>1</sub> | <p>1A-1</p>  | WT: TGTCCATGGCTAACCCGGCGG<br>WT: TGTCCATGGCTAACCCGGCGG   | Wild-type    |
|                                        | <p>1A-5</p>  | WT: TGTCCATGGCTAACCCGGCGG<br>WT: TGTCCATGGCTAACCCGGCGG   | Wild-type    |
|                                        | <p>1A-8</p>  | WT: TGTCCATGGCTAACCCGGCGG<br>WT: TGTCCATGGCTAACCCGGCGG   | Wild-type    |
|                                        | <p>1A-16</p> | WT: TGTCCATGGCTAACCCGGCGG<br>WT: TGTCCATGGCTAACCCGGCGG   | Wild-type    |
|                                        | <p>2A-2</p>  | WT: TGTCCATGGCTAACCCGGCGG<br>WT: TGTCCATGGCTAACCCGGCGG   | Wild-type    |
|                                        | <p>3A-2</p>  | M2: TGTCCATGGCTAACCTCGGCGG<br>M2: TGTCCATGGCTAACCTCGGCGG | Homozygote   |
|                                        | <p>3A-3</p>  | WT: TGTCCATGGCTAACCCGGCGG<br>WT: TGTCCATGGCTAACCCGGCGG   | Wild-type    |
|                                        | <p>3A-4</p>  | M3: TGTCCATGGCTAACCCGGCGG<br>M2: TGTCCATGGCTAACCTCGGCGG  | Bi-allele    |
|                                        | <p>3A-5</p>  | WT: TGTCCATGGCTAACCCGGCGG<br>WT: TGTCCATGGCTAACCCGGCGG   | Wild-type    |
|                                        | <p>3A-6</p>  | WT: TGTCCATGGCTAACCCGGCGG<br>M2: TGTCCATGGCTAACCTCGGCGG  | Heterozygote |
|                                        | <p>4A-1</p>  | M1: TGTCCATGGCTAACCCGGCGG<br>M1: TGTCCATGGCTAACCCGGCGG   | Homozygote   |
|                                        | <p>4A-2</p>  | M1: TGTCCATGGCTAACCCGGCGG<br>M1: TGTCCATGGCTAACCCGGCGG   | Homozygote   |
|                                        | <p>4A-3</p>  | M1: TGTCCATGGCTAACCCGGCGG<br>M1: TGTCCATGGCTAACCCGGCGG   | Homozygote   |
