# Supplementary material for: CRISPR/Cas9-targeted mutagenesis of Os8N3 in rice to confer resistance to Xanthomonas oryzae pv. oryzae
Source: PubMed Central journal article supplement (PMC6708514; doi:10.1186/s12284-019-0325-7), 2019-08-24
Supplement: 12284_2019_325_MOESM4_ESM.pdf [file 12284_2019_325_MOESM4_ESM.pdf]

|                                        |                                                                                                       |                                                                                         |              |
|----------------------------------------|-------------------------------------------------------------------------------------------------------|-----------------------------------------------------------------------------------------|--------------|
| Kitaake                                | 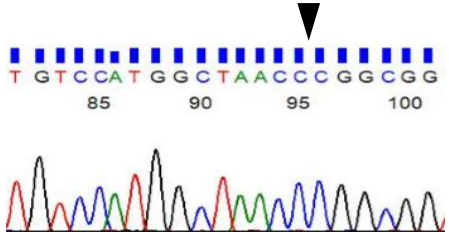                     | WT: TGTCCATGGCTAACC-CGGCGG<br>WT: TGTCCATGGCTAACC-CGGCGG                                | Wild-type    |
| OsU6a <i>xa13m</i> /Kit T <sub>2</sub> | <b>1A-5-5</b><br>   | WT: TGTCCATGGCTAACC-CGGCGG<br>WT: TGTCCATGGCTAACC-CGGCGG                                | Wild-type    |
|                                        | <b>1A-5-6</b><br>   | WT: TGTCCATGGCTAACC-CGGCGG<br>M2: TGTCCATGGCTAACCTCGGCGG                                | Heterozygote |
|                                        | <b>1A-8-9</b><br>   | WT: TGTCCATGGCTAACC-CGGCGG<br>WT: TGTCCATGGCTAACC-CGGCGG                                | Wild-type    |
|                                        | <b>1A-16-2</b><br> | WT: TGTCCATGGCTAACC-CGGCGG<br>WT: TGTCCATGGCTAACC-CGGCGG                                | Wild-type    |
|                                        | <b>3A-6-1</b><br> | WT: TGTCCATGGCTAACC-CGGCGG<br>M2: TGTCCATGGCTAACCTCGGCGG<br>M1: TGTCCATGGCTAACCAACGGCGG | Chimera      |
|                                        | <b>3A-6-3</b><br> | WT: TGTCCATGGCTAACC-CGGCGG<br>WT: TGTCCATGGCTAACC-CGGCGG                                | Wild-type    |
|                                        | <b>4A-1-6</b><br> | M1: TGTCCATGGCTAACCAACGGCGG<br>M1: TGTCCATGGCTAACCAACGGCGG                              | Homozygote   |
|                                        | <b>4A-1-7</b><br> | M1: TGTCCATGGCTAACCAACGGCGG<br>M1: TGTCCATGGCTAACCAACGGCGG                              | Homozygote   |
|                                        | <b>4A-3-3</b><br> | M1: TGTCCATGGCTAACCAACGGCGG<br>M1: TGTCCATGGCTAACCAACGGCGG                              | Homozygote   |
|                                        | <b>4A-3-5</b><br> | M1: TGTCCATGGCTAACCAACGGCGG<br>M1: TGTCCATGGCTAACCAACGGCGG                              | Homozygote   |
