# Supplementary material for: CRISPR/Cas9-targeted mutagenesis of Os8N3 in rice to confer resistance to Xanthomonas oryzae pv. oryzae
Source: PubMed Central journal article supplement (PMC6708514; doi:10.1186/s12284-019-0325-7), 2019-08-24
Supplement: 12284_2019_325_MOESM5_ESM.pdf [file 12284_2019_325_MOESM5_ESM.pdf]

|                                        |                     |                                                          |            |
|----------------------------------------|---------------------|----------------------------------------------------------|------------|
| Kitaake                                |                     | WT: TGTCCATGGCTAACCCGGCGG<br>WT: TGTCCATGGCTAACCCGGCGG   | Wild-type  |
| OsU6a <i>xa13m</i> /Kit T <sub>3</sub> | <b>1A-5-5-1</b><br> | WT: TGTCCATGGCTAACCCGGCGG<br>WT: TGTCCATGGCTAACCCGGCGG   | Wild-type  |
|                                        | <b>1A-5-6-3</b><br> | WT: TGTCCATGGCTAACCCGGCGG<br>M2: TGTCCATGGCTAACCCGGCGG   | Wild-type  |
|                                        | <b>1A-5-6-4</b><br> | WT: TGTCCATGGCTAACCCGGCGG<br>WT: TGTCCATGGCTAACCCGGCGG   | Wild-type  |
|                                        | <b>1A-5-6-5</b><br> | WT: TGTCCATGGCTAACCCGGCGG<br>WT: TGTCCATGGCTAACCCGGCGG   | Wild-type  |
|                                        | <b>1A-5-6-6</b><br> | WT: TGTCCATGGCTAACCCGGCGG<br>WT: TGTCCATGGCTAACCCGGCGG   | Wild-type  |
|                                        | <b>3A-6-1-1</b><br> | M1: TGTCCATGGCTAACCTCGGCGG<br>M1: TGTCCATGGCTAACCTCGGCGG | Homozygote |
|                                        | <b>3A-6-1-2</b><br> | M1: TGTCCATGGCTAACCTCGGCGG<br>M1: TGTCCATGGCTAACCTCGGCGG | Homozygote |
|                                        | <b>3A-6-1-3</b><br> | M1: TGTCCATGGCTAACCTCGGCGG<br>M1: TGTCCATGGCTAACCTCGGCGG | Homozygote |
|                                        | <b>3A-6-1-4</b><br> | M1: TGTCCATGGCTAACCTCGGCGG<br>M1: TGTCCATGGCTAACCTCGGCGG | Homozygote |
|                                        | <b>3A-6-1-5</b><br> | M1: TGTCCATGGCTAACCTCGGCGG<br>M1: TGTCCATGGCTAACCTCGGCGG | Homozygote |
|                                        | <b>4A-1-7-1</b><br> | M2: TGTCCATGGCTAACACGGCGG<br>M2: TGTCCATGGCTAACACGGCGG   | Homozygote |
|                                        | <b>4A-1-7-6</b><br> | M2: TGTCCATGGCTAACACGGCGG<br>M2: TGTCCATGGCTAACACGGCGG   | Homozygote |
