# Supplementary material for: CRISPR/Cas9-targeted mutagenesis of Os8N3 in rice to confer resistance to Xanthomonas oryzae pv. oryzae
Source: PubMed Central journal article supplement (PMC6708514; doi:10.1186/s12284-019-0325-7), 2019-08-24
Supplement: 12284_2019_325_MOESM7_ESM.pdf [file 12284_2019_325_MOESM7_ESM.pdf]

**a**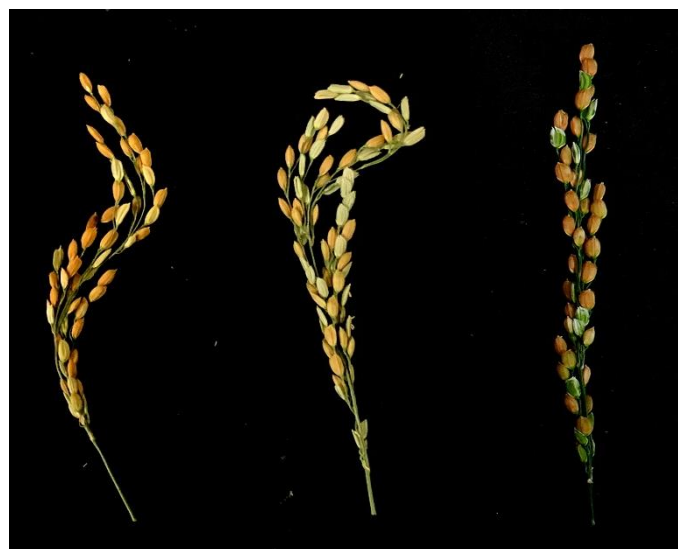

Kitaake

3A-6-1-2

4A-1-7-4

OsU6a *xa13m*/Kit**b**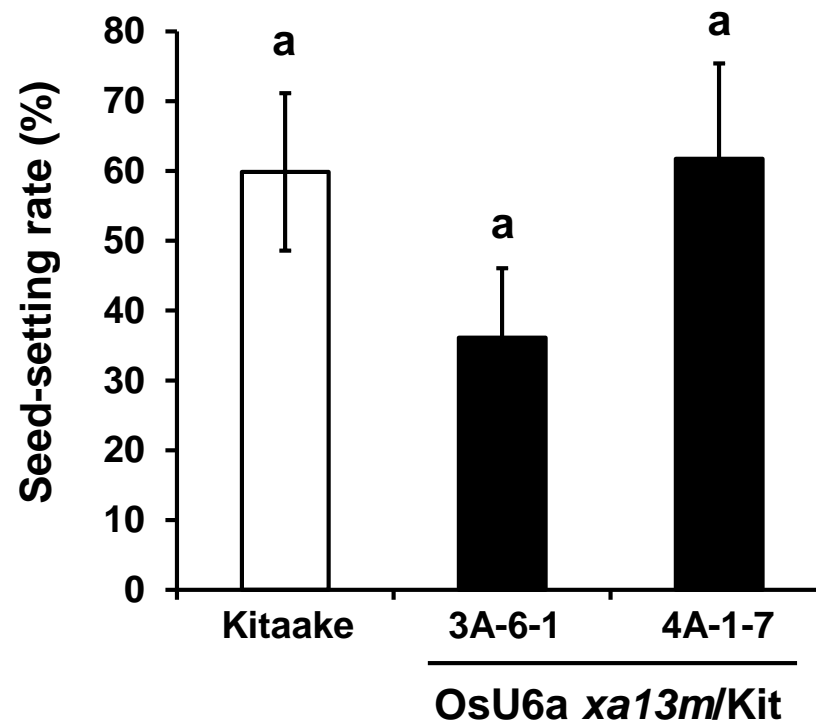**c**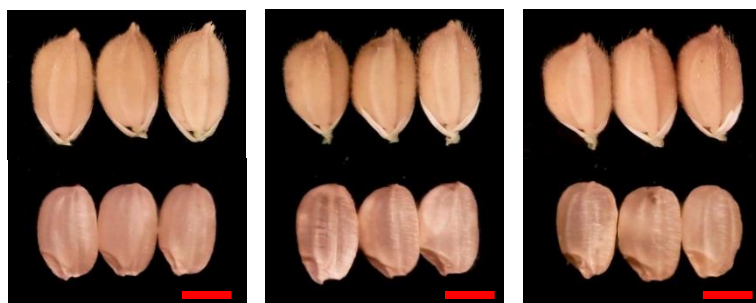

Kitaake

3A-6-1-1

4A-1-7-1

OsU6a *xa13m*/Kit
